# Supplementary material for: Ozone pollution during the COVID-19 lockdown in the spring of 2020 over Europe, analysed from satellite observations, in situ measurements, and models
Source: Copernicus journal article supplement (doi:10.5194/acp-22-4471-2022), 2022-04-06
Supplement: Supplementary file 1 [file acp-22-4471-2022-supplement.zip]

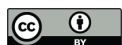

*Supplement of*

## **Ozone pollution during the COVID-19 lockdown in the spring of 2020 over Europe, analysed from satellite observations, in situ measurements, and models**

**Juan Cuesta et al.**

*Correspondence to:* Juan Cuesta ([cuesta@lisa.ipsl.fr](mailto:cuesta@lisa.ipsl.fr))

- [acp-22-4471-2022-supplement-title-page.pdf](#)
- [supplement\\_O3\\_COVID\\_Europe\\_sat\\_mod\\_insitu\\_Cuesta\\_et\\_al\\_ACP\\_revised\\_with\\_references.docx](#)

The copyright of individual parts of the supplement might differ from the article licence.
